# Supplementary material for: Artemisinin resistance without pfkelch13 mutations in Plasmodium falciparum isolates from Cambodia
Source: PubMed Central journal article supplement (PMC5427620; doi:10.1186/s12936-017-1845-5), 2017-05-12
Supplement: 12936_2017_1845_MOESM4_ESM.pdf [file 12936_2017_1845_MOESM4_ESM.pdf]

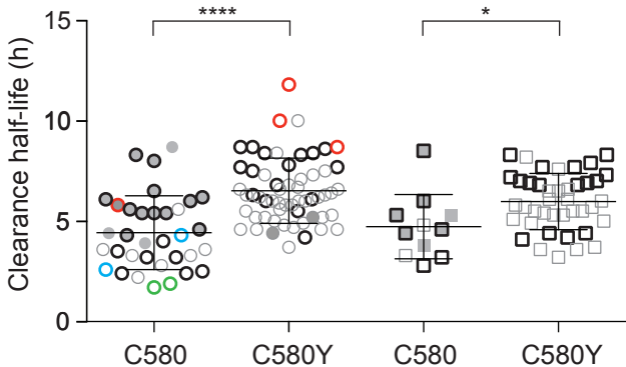

**Additional file 3.** Distribution of C580Y mutations in Cambodian isolates. Parasites from Pursat (round symbols) or Pailin (square symbols) were classified according to their *Pfkelch13* alleles. Comparison of clearance half-life values (hours, h) from parasites harboring the wild-type (C) or mutant (Y) allele at amino acid position 580 in the *Pfkelch13* locus, with culture-adapted parasites represented by black outlined symbols. C580 parasites harboring a mutation in the *Pfkelch13* propeller domain other than C580Y are indicated by grey filled symbols. An unpaired t test was performed between the C580 and C580Y carrying parasites from Pursat ( $p < 0.0001$ ) or Pailin ( $p < 0.05$ ); with significant differences ( $p < 0.0001$  overall) when both Pursat and Pailin were combined.
