# Supplementary material for: Artemisinin resistance without pfkelch13 mutations in Plasmodium falciparum isolates from Cambodia
Source: PubMed Central journal article supplement (PMC5427620; doi:10.1186/s12936-017-1845-5), 2017-05-12
Supplement: 12936_2017_1845_MOESM5_ESM.pdf [file 12936_2017_1845_MOESM5_ESM.pdf]

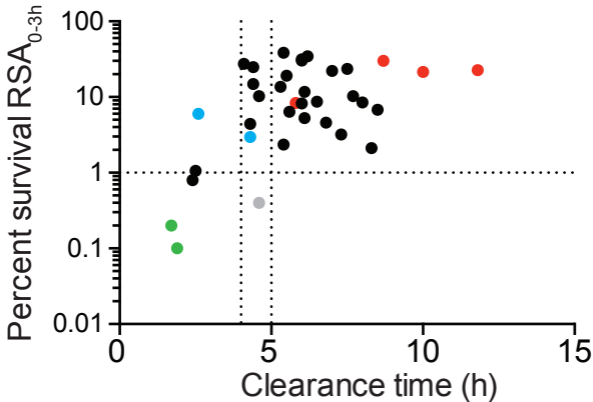

**Additional file 4.** Association between percent survival RSA<sub>0-3h</sub> and clearance time. Correlation between clearance time on the x-axis and percent survival RSA<sub>0-3h</sub> on the y-axis. Each dot represents an isolate. Samples represented by color were used for *in vitro* drug testing and for *pfmdr1* copy number variation determination—green for ART sensitive; blue for discordant; and red for ART resistant parasites. The grey dot marks the isolate with an E270K mutation. The dotted lines represent the cut off used to discriminate between resistant and sensitive parasites (1% for RSA<sub>0-3h</sub>, 4 or 5% for clearance).
