# Supplementary material for: Artemisinin resistance without pfkelch13 mutations in Plasmodium falciparum isolates from Cambodia
Source: Malar J. 2017 May 12;16:195. doi: 10.1186/s12936-017-1845-5 (PMC5427620; doi:10.1186/s12936-017-1845-5)
Supplement: Supplementary file 6 — Additional file 6. All genes analysed for candidate gene approach. [file 12936_2017_1845_MOESM6_ESM.xlsx]

## Sheet: Sheet1
[Gene ID]	[Genomic Location]	[Product Description]
PF3D7_0110600	Pf3D7_01_v3: 405,739 - 412,169 (+)	phosphatidylinositol-4-phosphate 5-kinase (PIP5K)
PF3D7_0311300	Pf3D7_03_v3: 480,122 - 483,453 (-)	phosphatidylinositol 3- and 4-kinase, putative
PF3D7_0417200	Pf3D7_04_v3: 748,088 - 749,914 (+)	bifunctional dihydrofolate reductase-thymidylate synthase (DHFR-TS)
PF3D7_0509800	Pf3D7_05_v3: 410,268 - 415,308 (+)	phosphatidylinositol 4-kinase (PI4K)
PF3D7_0515300	Pf3D7_05_v3: 628,981 - 635,382 (+)	phosphatidylinositol 3-kinase (PI3K)
PF3D7_0709000	Pf3D7_07_v3: 403,222 - 406,317 (+)	chloroquine resistance transporter (CRT)
PF3D7_0720700	Pf3D7_07_v3: 891,683 - 899,051 (+)	phosphoinositide-binding protein, putative
PF3D7_0827900	Pf3D7_08_v3: 1,206,788 - 1,208,394 (-)	protein disulfide isomerase (PDI8)
PF3D7_0810800	Pf3D7_08_v3: 548,200 - 550,616 (+)	hydroxymethyldihydropterin pyrophosphokinase-dihydropteroate synthase (PPPK-DHPS)
PF3D7_0917900	Pf3D7_09_v3: 737,985 - 740,276 (+)	heat shock protein 70 (HSP70-2)
PF3D7_1010700	Pf3D7_10_v3: 422,961 - 424,365 (+)	dolichyl-phosphate-mannose protein mannosyltransferase, putative
PF3D7_1012700	Pf3D7_10_v3: 487,252 - 491,828 (+)	protein phosphatase, putative
PF3D7_1134100	Pf3D7_11_v3: 1,323,043 - 1,324,314 (-)	protein disulfide isomerase (PDI-11)
PF3D7_1115600	Pf3D7_11_v3: 589,707 - 590,629 (-)	peptidyl-prolyl cis-trans isomerase (CYP19B)
PF3D7_1222300	Pf3D7_12_v3: 883,567 - 886,032 (-)	endoplasmin, putative (GRP94)
PF3D7_1343700	Pf3D7_13_v3: 1,724,817 - 1,726,997 (-)	kelch protein, putative
PF3D7_1344200	Pf3D7_13_v3: 1,769,129 - 1,771,927 (+)	heat shock protein 110, putative (HSP110)
PF3D7_1318100	Pf3D7_13_v3: 748,387 - 748,971 (-)	ferredoxin, putative
PF3D7_1322700	Pf3D7_13_v3: 958,219 - 959,175 (-)	conserved Plasmodium protein, unknown function
PF3D7_1437900	Pf3D7_14_v3: 1,533,329 - 1,534,947 (+)	HSP40, subfamily A, putative (ERdj3)
PF3D7_1447900	Pf3D7_14_v3: 1,954,601 - 1,957,675 (-)	multidrug resistance protein 2 (heavy metal transport family) (MDR2)
PF3D7_1451200	Pf3D7_14_v3: 2,094,340 - 2,099,736 (-)	conserved Plasmodium protein, unknown function
PF3D7_1460900.1	Pf3D7_14_v3: 2,480,440 - 2,481,916 (+)	apicoplast ribosomal protein S10 precursor, putative
Additional file 5. All genes analysed for candidate gene approach
