# Supplementary material for: Artemisinin resistance without pfkelch13 mutations in Plasmodium falciparum isolates from Cambodia
Source: Malar J. 2017 May 12;16:195. doi: 10.1186/s12936-017-1845-5 (PMC5427620; doi:10.1186/s12936-017-1845-5)
Supplement: Supplementary file 7 — Additional file 7. All positions that are variant in RSA0–3h phenotyped isolates. [file 12936_2017_1845_MOESM7_ESM.xlsx]

## Sheet: Sheet1
Chromosome	Position	Gene Name	Gene ID	Effect	AA Change	Reference	Alternate	Frequency	KH001-001	KH001-039	KH001-044	KH001-063
Pf3D7_01_v3	406699	phosphatidylinositol-4-phosphate 5-kinase	PF3D7_0110600	NS	T321A	A	G	0.69 (32)	A	A	A	G
Pf3D7_01_v3	409173	phosphatidylinositol-4-phosphate 5-kinase	PF3D7_0110600	NS	M1145I	G	A	0.59 (32)	G	A	G	G
Pf3D7_01_v3	410642	phosphatidylinositol-4-phosphate 5-kinase	PF3D7_0110600	NS	L1540V	T	G	0.19 (32)	G	T	G	G
Pf3D7_03_v3	480690	phosphatidylinositol 3- and 4-kinase	PF3D7_0311300	NS	S765N	C	T	0.5 (32)	T	C	C	C
Pf3D7_04_v3	748577	bifunctional dihydrofolate reductase-thymidylate synthase	PF3D7_0417200	NS	I164L	A	T	0.17 (32)	T	T	A	A
Pf3D7_05_v3	410327	phosphatidylinositol 4-kinase	PF3D7_0509800	NS	E20D	A	C	0.91 (32)	A	A	A	A
Pf3D7_05_v3	630260	phosphatidylinositol 3-kinase	PF3D7_0515300	NS	K427M	A	T	0.91 (32)	A	T	A	A
Pf3D7_05_v3	630271	phosphatidylinositol 3-kinase	PF3D7_0515300	NS	Q431K	C	A	0.28 (32)	A	C	A	A
Pf3D7_05_v3	631025	phosphatidylinositol 3-kinase	PF3D7_0515300	NS	I682T	T	C	0.5 (32)	T	T	C	T
Pf3D7_05_v3	631082	phosphatidylinositol 3-kinase	PF3D7_0515300	NS	C701Y	G	A	0.91 (32)	G	A	G	G
Pf3D7_05_v3	632969	phosphatidylinositol 3-kinase	PF3D7_0515300	NS	Y1330C	A	G	0.91 (32)	A	A	A	A
Pf3D7_07_v3	403687	chloroquine resistance transporter	PF3D7_0709000	NS	H97Y	C	T	0.97 (32)	C	C	C	C
Pf3D7_07_v3	895972	phosphoinositide-binding protein	PF3D7_0720700	NS	T1255P	A	C	0.91 (32)	A	A	A	C
Pf3D7_07_v3	896660	phosphoinositide-binding protein	PF3D7_0720700	NS	C1484F	G	T	0.64 (32)	G	T	G	G
Pf3D7_07_v3	897052	phosphoinositide-binding protein	PF3D7_0720700	NS	V1615I	G	A	0.5 (32)	A	G	G	A
Pf3D7_08_v3	1207166	protein disulfide isomerase	PF3D7_0827900	S	I358	T	A	0.89 (32)	T	T	T	T
Pf3D7_08_v3	1207933	protein disulfide isomerase	PF3D7_0827900	NS	I103V	T	C	0.89 (32)	T	T	C	T
Pf3D7_08_v3	549681	dihydropteroate synthetase	PF3D7_0810800	NS	S436A	T	G	0.8 (32)	T	T	G	T
Pf3D7_08_v3	549995	dihydropteroate synthetase	PF3D7_0810800	NS	K540N	A	T	0.34 (32)	T	T	A	A
Pf3D7_08_v3	550117	dihydropteroate synthetase	PF3D7_0810800	NS	A581G	C	G	0.3 (32)	G	G	C	C
Pf3D7_09_v3	738145	heat shock protein 70	PF3D7_0917900	I		G	A	0.93 (29)	G	G	het	G
Pf3D7_09_v3	739245	heat shock protein 70	PF3D7_0917900	NS	V310L	G	C	0.91 (32)	G	G	G	G
Pf3D7_10_v3	423158	dolichyl-phosphate-mannose protein mannosyltransferase	PF3D7_1010700	INTRON		T	G	0.14 (29)	G	G	T	G
Pf3D7_10_v3	489658	protein phosphatase	PF3D7_1012700	NS	N803Y	A	T	0.91 (32)	A	A	A	A
Pf3D7_10_v3	490648	protein phosphatase	PF3D7_1012700	NS	Y1133N	T	A	0.25 (32)	A	A	T	T
Pf3D7_10_v3	490720	protein phosphatase	PF3D7_1012700	NS	V1157L	G	C	0.25 (32)	C	C	G	G
Pf3D7_11_v3	1148726	phosphatidylinositol-4-phosphate-5-kinase	PF3D7_1129600	NS	N1325Y	A	T	0.94 (32)	A	A	A	A
Pf3D7_11_v3	1323909	protein disulfide isomerase	PF3D7_1134100	NS	I136V	T	C	0.88 (32)	T	T	C	T
Pf3D7_11_v3	589752	peptidyl-prolyl cis-trans isomerase	PF3D7_1115600	S	P181	T	C	0.97 (32)	T	T	T	T
Pf3D7_11_v3	590317	peptidyl-prolyl cis-trans isomerase	PF3D7_1115600	I		T	C	0.97 (31)	T	T	T	T
Pf3D7_13_v3	1725259	kelch protein	PF3D7_1343700	NS	C580Y	C	T	0.44 (32)	C	C	C	C
Pf3D7_13_v3	1725382	kelch protein	PF3D7_1343700	NS	R539T	C	G	0.97 (32)	C	C	C	C
Pf3D7_14_v3	1956225	multidrug resistance protein 2	PF3D7_1447900	NS	T484I	G	A	0.11 (32)	A	A	G	G
Pf3D7_14_v3	2096133	conserved Plasmodium protein	PF3D7_1451200	NS	G908R	C	G	0.16 (32)	G	het	G	G
Pf3D7_14_v3	2098642	conserved Plasmodium protein	PF3D7_1451200	S	N71	A	G	0.2 (32)	G	het	G	G
Pf3D7_14_v3	2099181	conserved Plasmodium protein	PF3D7_1451200	I		A	G	0.94 (31)	A	het	A	A
Pf3D7_14_v3	2481070	apicoplast ribosomal protein S10 precursor	PF3D7_1460900.1	NS	V127M	G	A	0.14 (32)	A	het	A	A
Additional file 6. All positions that are variant in RSA0-3h phenotyped isolates
NS (NonSynonymous Coding); S (Synonymous Coding): I (Intron)
Reference (position in 3D7)
Frequency (reference allele frequency in sample set with number of samples used in parenthesis)
