# Supplementary material for: Artemisinin resistance without pfkelch13 mutations in Plasmodium falciparum isolates from Cambodia
Source: Malar J. 2017 May 12;16:195. doi: 10.1186/s12936-017-1845-5 (PMC5427620; doi:10.1186/s12936-017-1845-5)
Supplement: Supplementary file 8 — Additional file 8. Spearman correlation coefficients between antimalarial EC50 values, in vivo clearance half-life, ring survival assay0–3h or pfmdr1 copy number. [file 12936_2017_1845_MOESM8_ESM.xlsx]

## Sheet: Sheet1
Variable	Spearman Correlation Coefficients n=8
	Half life	RSA0-3h	pfmdr1 copy number
artemisinin EC50	0.191	0.191	0.881**
dihydroartemisinin EC50	0.286	0.167	0.5238
artesunate EC50	0.691	0.5	0.762*
chloroquine EC50	0.286	0.333	-0.452
mefloquine EC50	0.548	0.238	0.762*
lumefantrine EC50	0.548	0.31	0.857*
piperaquine EC50	0.095	0.191	-0.619
atovaquone EC50	0.238	0.024	0.333
quinine EC50	0.548	0.405	0.452
half life	na	0.881**	0.214
RSA0-3h	0.881**	na	0.119
Additional file 7. Spearman correlation coefficients between antimalarial EC50 values, in vivo clearance half-life, ring survival assay0-3h or pfmdr1 copy number for 8 TRAC parasites. * P value (2-tailed) < 0.05
** P value (2-tailed) < 0.005
